## Relationship between the expressions of DLL3, ASC1, TTF-1 and Ki-67: First steps of precision medicine at SCLC

Samuel Silva<sup>1,2</sup>, Juliana C. Sousa<sup>2</sup>, Cleto Nogueira<sup>1,2</sup>, Raquel Feijo<sup>1,3</sup>, Francisco Martins Neto<sup>3</sup>, Laura Cardoso Marinho<sup>1,2</sup>, Guilherme Sousa<sup>2</sup>, Valeria Denninghoff<sup>4,5</sup> and Fabio Tavora<sup>1,2</sup>

<sup>1</sup>Department of Pathology, Faculty of Medicine, Federal University of Ceará, Fortaleza (Ceará), Brazil

<sup>2</sup>ARGOS Laboratory, Fortaleza (Ceará), Brazil

<sup>3</sup>Messejana Heart and Lung Hospital, Fortaleza (Ceará), Brazil

<sup>4</sup>Molecular Oncology Clinical Lab, University of Buenos Aires (UBA)—National Council for Scientific and Technical Research (CONICET), Buenos Aires, Argentina

<sup>5</sup>Liquid Biopsy and Cancer Interception Unit, GENYO, Centre for Genomics and Oncological Research (Pfizer/University of Granada/Andalusian Regional Government), Granada, Spain

**Correspondence to:** Fabio Tavora, **email:** fabio.tavora@argospatologia.com

**Keywords:** DLL3; pathology; biomarkers; qpath; small cell carcinoma

**Received:** July 29, 2024

**Accepted:** September 17, 2024

**Published:** October 11, 2024

**Copyright:** © 2024 Silva et al. This is an open access article distributed under the terms of the [Creative Commons Attribution License](https://creativecommons.org/licenses/by/4.0/) (CC BY 4.0), which permits unrestricted use, distribution, and reproduction in any medium, provided the original author and source are credited.

### ABSTRACT

**This study presents an observational, cross-sectional analysis of 64 patients diagnosed with small cell lung cancer (SCLC) at a reference laboratory for thoracic pathology between 2022 and 2024. The primary objective was to evaluate the expression of Delta-like ligand 3 (DLL3) and other neuroendocrine markers such as Chromogranin, and Synaptophysin, utilizing both traditional immunohistochemistry and digital pathology tools. Patients were primarily older adults, with a median age of over 71, and most biopsies were obtained from lung parenchyma. Immunohistochemistry (IHC) was performed using specific monoclonal antibodies, with DLL3 showing variable expression across the samples. Notably, DLL3 was expressed in 72.3% of the cases, with varied intensities and a semi-quantitative H-score applied for more nuanced analysis. ASCL1 was expressed in 97% of cases, with the majority considered low-expressors. Only 11% had high expression. TTF-1, traditionally not a conventional marker for the diagnosis of SCLC, was positive in half of the cases, suggesting its potential as a biomarker. The study underscores the significant variability in the expression of neuroendocrine markers in SCLC, with implications for both diagnosis and potential therapeutic targeting. DLL3, particularly, shows promise as a therapeutic target due to its high expression rate in the cohort. The use of digital pathology software QuPath enhanced the accuracy and depth of analysis, allowing for detailed morphometric analysis and potentially informing more personalized treatment approaches. The findings emphasize the need for further research into the role of these markers in the management and treatment of SCLC, considering the poor prognosis and high mortality rate observed in the cohort.**

### INTRODUCTION

Small cell lung cancer (SCLC) is an aggressive type of lung cancer that contributes to approximately 15% of lung cancer cases annually [1]. Patients with SCLC have

a poor prognosis, with a 5-year survival rate ranging from 3 to 27%, depending on the stage of the disease [2]. SCLC is a highly proliferative lung cancer that is not amenable to surgery in most cases due to rapid growth, early spread, and a tendency to develop drug resistance and relapse [3].

Genes and genomics/proteomic modifications related to the development, plasticity, and progression of SCLC, which could be identified as possible biomarkers for targeted therapy of this deadly disease, were already described: TP53/RB1 (98%/91%), TP73 (13%), PI3K3CA (15%), PTEN (9%), FGFR1 (8%), Hedgehog Signaling Pathway (80%), MYC (20%), KMT2D (13%), and NOTCH1 signaling (25%) [4].

By July 19, 2022, 107 patients received Tarlatamab in dose exploration (0.003 to 100 mg;  $n = 73$ ) and expansion (100 mg;  $n = 34$ ) cohorts. The median progression-free and overall survival were 3.7 months (95% CI, 2.1 to 5.4) and 13.2 months (95% CI, 10.5 to not reached), respectively. Exploratory analysis suggests that selecting for increased DLL3 expression can increase clinical benefit [5]. On May 16, 2024, the US Food and Drug Administration (FDA) granted accelerated approval to tarlatamab-dlle for extensive-stage small cell lung cancer (ES-SCLC) with disease progression on or after platinum-based chemotherapy [6]. A phase 2 study was conducted on subjects with relapsed/refractory SCLC after two or more prior lines of treatment [7]. Efficacy, safety, tolerability, and pharmacokinetics of Tarlatamab were evaluated in 99 patients enrolled in DeLLphi-301, an open-label, multicenter, multi-cohort study [7]. Tarlatamab, administered at a 10-mg dose every two weeks, showed antitumor activity with durable objective responses and promising survival outcomes in patients with previously treated SCLC. No new safety signals were identified [7]. Tarlatamab (AMG 757) is the first DLL3-targeting bispecific T-cell engager therapy that activates a patient's T cells to attack DLL3-expressing tumor cells, which is a bispecific T-cell engager molecule that binds both DLL3 and CD3, leading to T-cell-mediated tumor lysis [8].

DLL3 is a protein that plays a critical role in the Notch signaling pathway, which is involved in cell differentiation, proliferation, and apoptosis [9, 10]. In humans, DLL3 is predominantly expressed in neuroendocrine tissues. It has been aberrantly expressed on the surface of up to 80–85% of SCLC cells and minimally expressed in normal tissues, making it a compelling therapeutic target [5], such as in other neuroendocrine carcinomas [10, 11]. It is expressed both in the cytoplasm and in the membrane of SCLC cells [12]. Despite the growing body of knowledge on the role of DLL3 in lung cancer, there remains a significant gap in our understanding of the actual expression rate of DLL3 when assessed by immunohistochemistry (IHC) in routine clinical laboratories. In a real-world study of DLL3 as an SCLC therapeutic target, positive DLL3 expression (defined as  $\geq 25\%$  of tumor cells) was identified in 895/1050 (85%) patients with one specimen and evaluable DLL3 expression; 719/1050 (68%) patients had high DLL3 expression (defined as  $\geq 75\%$  of tumor cells). There was no significant difference in median overall survival from SCLC diagnosis for evaluable patients with

non-missing data based on DLL3 expression (negative DLL3 expression ( $n = 139$ ), 9.5 months; positive DLL3 expression ( $n = 747$ ), 9.5 months; all evaluable patients ( $n = 893$ , 9.5 months) [13]. With the advent of anti-DLL3 therapies, studies of interrelationships between different molecules still need to be included, such as thyroid transcription factor-1 (TTF-1), which is involved in the differentiation of lung epithelial cells and is commonly expressed in high-grade lung and neuroendocrine adenocarcinomas, or Ki-67 protein (MKI67) which is a cellular marker for proliferation, found in the nucleus of cancer cells that are actively growing and dividing [14, 15]. These relationships could provide insights into the tumor biology of SCLC and rare tumors such as the Large-Cell Neuroendocrine Carcinomas (LCNEC), representing 1–3% of all primary lung cancers, and potentially guide treatment decisions and prognostication in a clinical setting [16, 17].

In this study, the qualitative and quantitative protein expression of DLL3, ASCL1, TTF-1, and Ki-67 was retrospectively analyzed by digital pathology in patients with SCLC, and this expression was linked to median overall survival using a multivariate mathematical model.

## RESULTS

### Patients' characteristics

Sixty-four cases were included (mean age  $71 \pm 10$ ), with a balanced relation between gender (32 females and 32 males, Table 1). The mean age for males was  $72 \pm 10$  years, and for females,  $70 \pm 10$  years ( $p = 0.460$ ). Most patients were older than 60 (54 patients, 84.4%), as depicted in the population pyramid (Table 1).

The majority of cases were biopsied from lung parenchyma, either by transbronchial/endobronchial biopsies or transthoracic CT-guided procurement (56 cases, 90.3%). Four cases were pleural biopsies, and two were metastasis in lymph nodes.

Chromogranin was positive in 70.3% of cases, with 15.4% showing 1+ intensity, 19.2% 2+ intensity, and 23.1% 3+ intensity. Synaptophysin was positive in 83.8% of cases, with 24.0% showing 1+ intensity, 20.0% 2+ intensity, and 32.0% 3+ intensity. CD56 was positive in 94.4% of cases, and its intensity was not evaluated (Table 1). All cases had at least one classical neuroendocrine marker positive and conventional small-cell carcinoma morphology.

Fifteen patients (18%) were followed by palliative care and did not receive chemotherapy. All remaining patients included in the study received standard chemotherapy for small-cell neuroendocrine carcinoma. The follow-up was complete until the patients died from the disease. The mean overall survival was 77.5 days with a 95% confidence interval of 36 to 116 days (Table 1), with a maximum of 557 days.

**Table 1: Detailed patient demographics and quantitative analysis of neuroendocrine biomarker expression (KI-67, Chromogranin A, Synaptophysin, CD56, TTF1, ASCL1, and DLL3) in small cell lung cancer (SCLC) cohort**

| Characteristics                          | Results              |                       |                          |
|------------------------------------------|----------------------|-----------------------|--------------------------|
| <i>Gender, n (%)</i>                     |                      |                       |                          |
| Female                                   | 32 (50%)             |                       |                          |
| Male                                     | 32 (50%)             |                       |                          |
| <i>Age at diagnosis, Average (range)</i> | 71 (41–43)           |                       |                          |
| <i>Half-life overall survival (days)</i> | 136.19               |                       |                          |
| <i>KI-67</i>                             |                      |                       |                          |
| Global, median (range)                   | 80.0 (40–97.20)      |                       |                          |
| <i>Chromogranin A</i>                    |                      |                       |                          |
| Class N (%)                              | Negative             | Positive              |                          |
|                                          | 11 (29.7%)           | 26 (70.3%)            |                          |
| <i>Synatophysin</i>                      |                      |                       |                          |
| Class N (%)                              | Negative             | Positive              |                          |
|                                          | 6 (16.2%)            | 31 (83.8%)            |                          |
| <i>CD56</i>                              |                      |                       |                          |
| Class N (%)                              | Negative             | Positive              |                          |
|                                          | 2 (5.6%)             | 34 (94.4%)            |                          |
| <i>TTF1</i>                              |                      |                       |                          |
| H-score, median (range)                  | 37.30 (0–296.52)     |                       |                          |
| Quantification, median (range)           | 17.25 (0–99.90)      |                       |                          |
| Classification 1 Quantification, N (%)   | Negative (TTF1 = 0)  | Positive (TTF1 ≥ 1)   |                          |
|                                          | 31 (48%)             | 33 (52%)              |                          |
| Classification 2 Quantification, N (%)   | Negative (TTF1 = 0)  | Low (1 ≤ TTF1 ≤ 49)   | High (50 ≤ TTF1 ≤ 100)   |
|                                          | 31 (48%)             | 4 (6%)                | 29 (45%)                 |
| Classification 3 H-score, N (%)          | Negative (TTF1 = 0)  | Low (1 ≤ TTF1 ≤ 149)  | High (150 ≤ TTF1 ≤ 300)  |
|                                          | 31 (48%)             | 12 (19%)              | 21 (33%)                 |
| <i>ASCL1</i>                             |                      |                       |                          |
| H-score, median (range)                  | 57.08 (0.01–268.66)  |                       |                          |
| Quantification, median (range)           | 51.10 (0–99,90)      |                       |                          |
| Classification 1 Quantification          | Negative (ASCL1 = 0) | Positive (ASCL1 ≥ 1)  |                          |
|                                          | 2 (3%)               | 62 (97%)              |                          |
| Classification 2 Quantification          | Negative (ASCL1 = 0) | Low (1 ≤ ASCL1 ≤ 49)  | High (50 ≤ ASCL1 ≤ 100)  |
|                                          | 2 (3%)               | 28 (44%)              | 34 (53%)                 |
| Classification 3 H-score                 | Negative (ASCL1 = 0) | Low (1 ≤ ASCL1 ≤ 149) | High (150 ≤ ASCL1 ≤ 300) |
|                                          | 2 (3%)               | 55 (86%)              | 7 (11%)                  |
| <i>DLL3</i>                              |                      |                       |                          |
| H-score, median (range)                  | 57.08 (0–289)        |                       |                          |
| Quantification, median (range)           | 51.10 (0–99.30)      |                       |                          |
| Classification 1 Quantification          | Negative (DLL3 = 0)  | Positive (DLL3 ≥ 1)   |                          |
|                                          | 18 (28%)             | 46 (72%)              |                          |
| Classification 2 Quantification          | Negative (DLL3 = 0)  | Low (1 ≤ DLL3 ≤ 49)   | High (50 ≤ DLL3 ≤ 100)   |
|                                          | 18 (28%)             | 27 (42%)              | 19 (30%)                 |
| Classification 3 H-score                 | Negative (DLL3 = 0)  | Low (1 ≤ DLL3 ≤ 149)  | High (150 ≤ DLL3 ≤ 300)  |
|                                          | 18 (28%)             | 42 (66%)              | 5 (8%)                   |



## TTF-1 expression

While TTF-1 is not usually considered a conventional marker for diagnosing small cell carcinoma in most centers, it is positive in most of them. In the current cohort, it was positive in 33 cases (52%) and negative in 31 cases (48%) (Table 1). The percentage of tumor cells with TTF-1 averaged 39.6% (SD 43.4). Eleven (11, 18.3%) had 100% of TTF-1 positivity. When assigned a histologic score of percentage versus intensity of positivity, cases

had an H-score median of 37,30 (SD 110,08). Twenty-one cases (21, 33%) had an H-score of 150 or higher (Table 1).

## Ki67 expression

Ki67 was positively expressed in all cases diagnosed with small cell carcinoma due to its high proliferation rate (Figure 1). In the cohort, Ki67 showed positive expression in 100% of the cases, with an average percentage of positive cells of 73.73% (SD: 15.80). The case with the

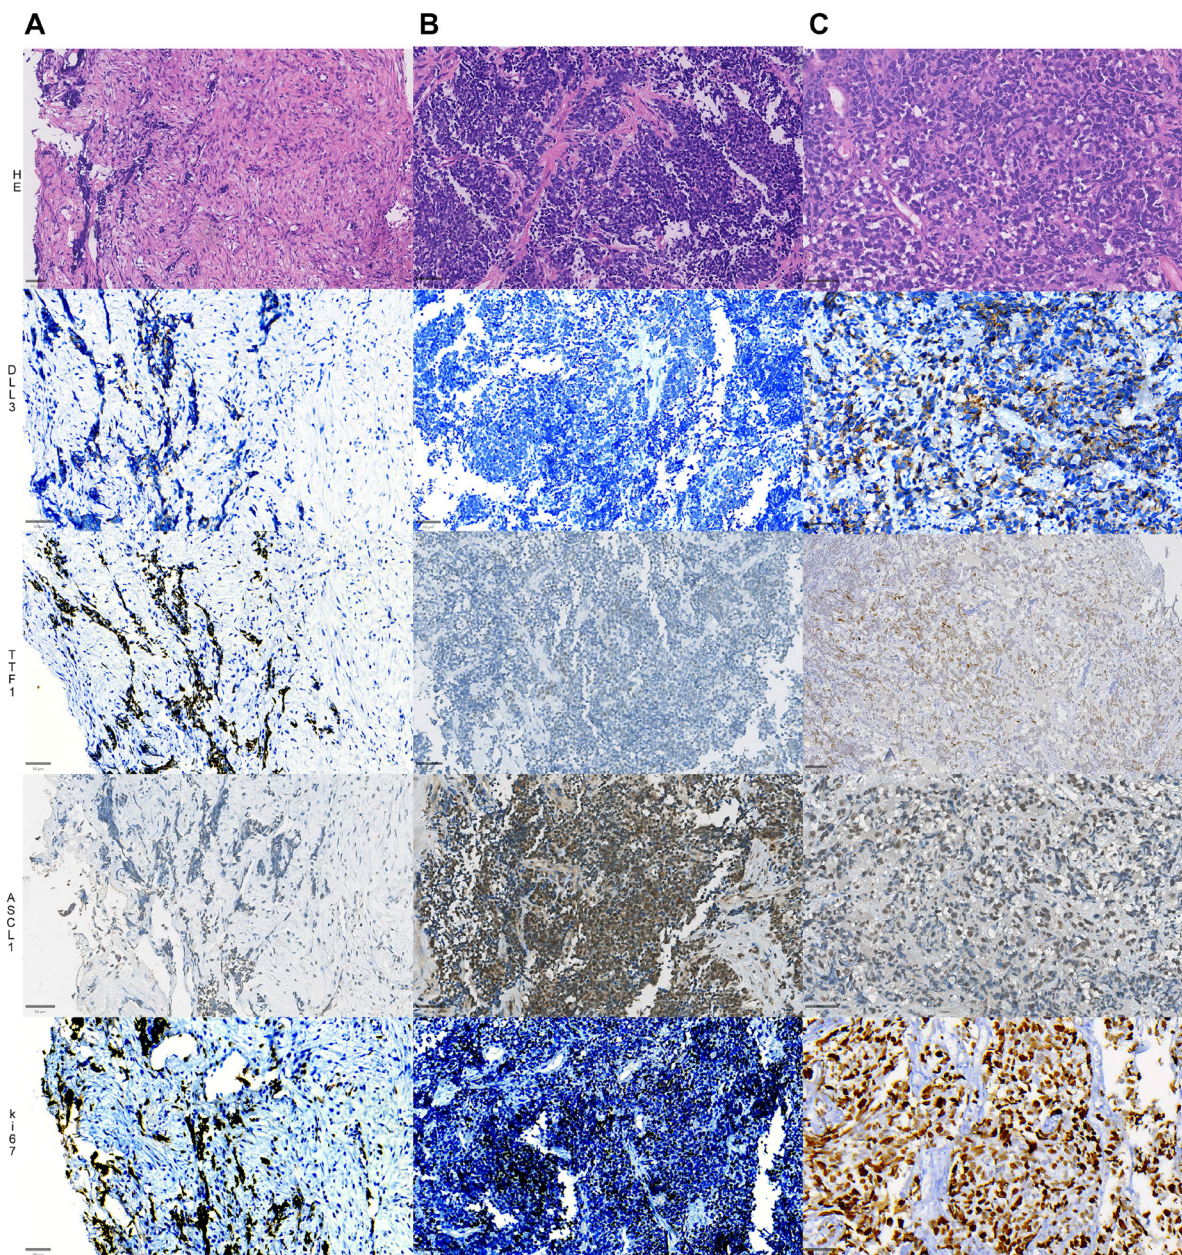

**Figure 1:** Representative slides of 3 different cases of SCLC (A–C), showing distinct morphology (top panel, HE sections) and expressions of DLL3 in the second row, TTF1 in the third row, ASCL1 expression in the fourth row and ki67 index in the fifth and final row. The first cases (1st column) shows a moderate expression of DLL3, strong positivity for TTF1, weak and focal positivity for ASCL1; the second case (second column) shows negative DLL3, negative TTF1, strong and diffuse nuclear expression for ASCL1, while the third case (3rd column) shows strong positivity for DLL3, TTF1 and ASCL1. All cases show a high ki-67 proliferative index. Bars = 50  $\mu$ M (micrometers).



highest expression exhibited an immunohistochemical positivity of 97.20%, while the case with the lowest expression showed positivity in 40% of the cells (Table 1).

### ASCL1 expression

Tissue was available for the study of ASCL1 in 64 cases (Figure 1). The H-score had a median of 57,08 (SD 54.55). Only two cases (3%) were completely negative for this antibody, while the majority (55 cases, 86%) had an H-score of 10–150 and were considered low-expressors.

Seven cases (7, 11%) were considered high expression. Only one case (1.4%) had an H-score of more than 250 (Table 1).

### DLL3 expression

DLL3-positive SCLC tissue was used as a positive control, and DLL3-negative lung adenocarcinoma tissue was used as a negative control. As per previously published data (Figure 2), the staining pattern was cytoplasmic and membranous (Figure 1) [13, 18].

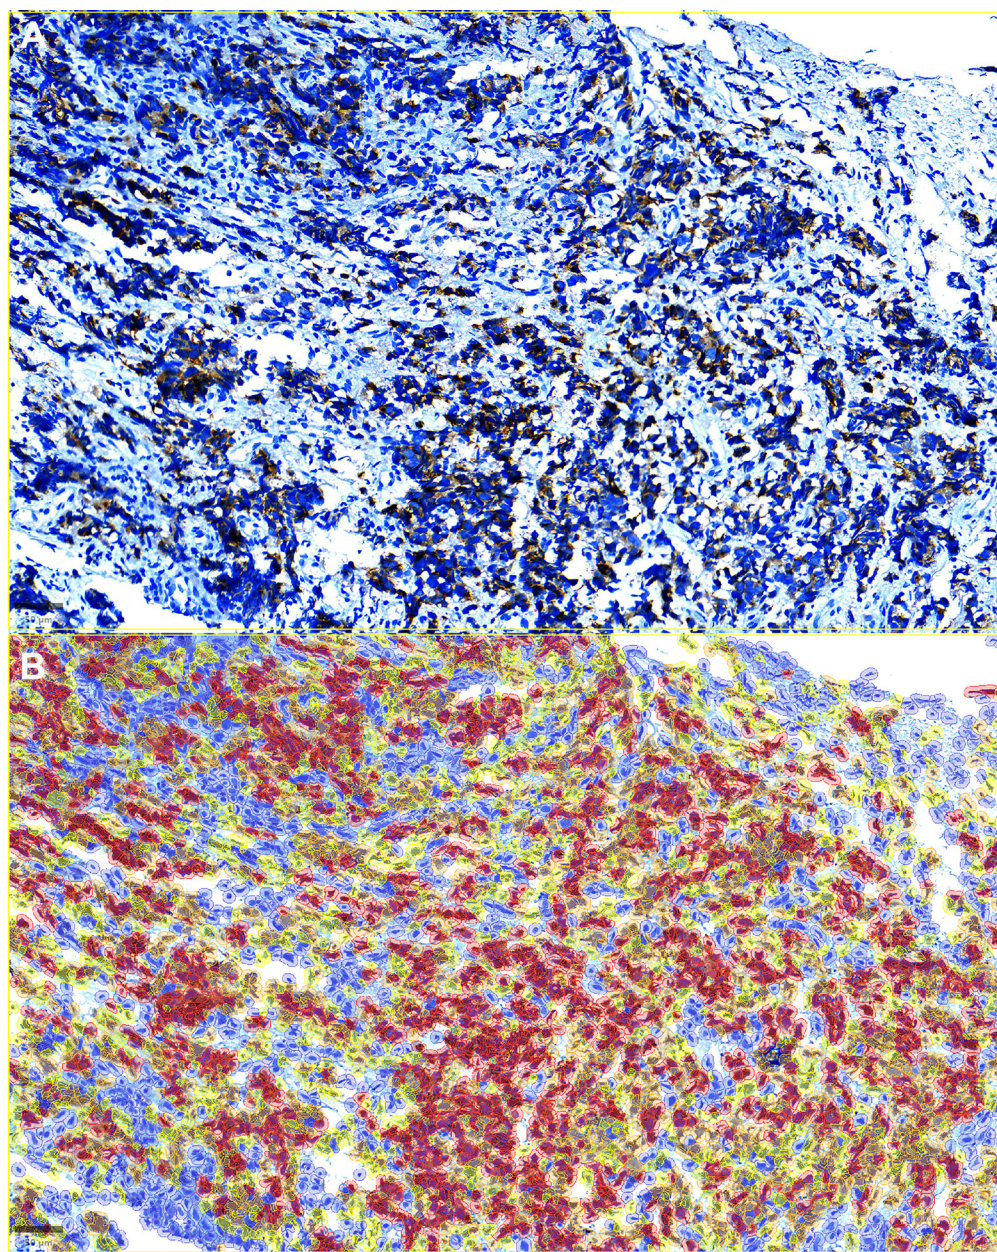

**Figure 2: Qupath H-score calculation and analyses.** Top (A). Representative image of a case showing DLL3 positivity in tumor cells. Note the strong cytoplasmic and membranous staining. Bottom (B) Representative image from the same field from above show cell staining intensity for the indicated DLL3 protein (DAB staining calculation). Cell staining intensity is represented as follows: negative (blue), low (yellow), medium (orange), and high (red). The H-score is calculated based on the percentage of positive cells by the staining of low, medium and high intensity. Bar = 50  $\mu$ M (micrometers).



Forty-six (46, 72%) had some expression of DLL3 (18 negative, 28%). Nineteen cases (30%) expressed DLL3 in less than 50% of tumor cells, while 27 (42%) expressed it in more than 50% of cells. When the h-score was calculated, only five cases (8%) scored above 150 (Table 1).

### Association between DLL3, ASCL1, TTF-1 and Ki-67 immunoexpression

Both TTF-1 and DLL3 were evaluated by the percentage of positive cells and H-score. ASCL1 was evaluated by H-score. As expected, ASCL1 expression was strongly associated with synaptophysin positivity ( $p = 0,003$ ) (Figure 3A, Table 2) ASCL1 expression did not have any differences regarding age, Ki-67 positivity, chromogranin or TTF-1 expression (Table 2). DLL3 expression was strongly associated with TTF-1 positivity (Figure 3B, 3C and Table 2). Tumors that were positive for TTF-1 had a higher percentage of DLL-3 expression both in percentage as well as in H-score ( $p < 0.001$ ). The correlation between biomarkers TTF-1 and DLL3 was positive demonstrated in Figure 3D.

### Survival and multivariate analyses

The mean global survival of all patients included in the study was 77.5 days (Figure 4). Age, sex, and all conventional neuroendocrine markers did not correlate with overall survival. Using Cox regression, epidemiological variables, as well as TTF-1 and DLL3 expression were tested. It was observed that TTF1 negative patients are a marker of worse prognosis in patients with SCLC compared to patients with positive expression ( $p = 0.014$ ) (Figure 5A). [...] DLL3 and ASCL1 did not have any correlation with overall survival (Figure 5B, 5C).

## DISCUSSION

Precision medicine is an innovative approach to disease prevention and treatment that considers differences

in people's genes, injuries, environments, and lifestyles to target the right therapies to the right patients at the right time. In oncology, precision medicine uses genetic and molecular information, tailoring treatment on a single patient profile, optimizing efficacy, and minimizing toxicities [19]. This approach is revolutionizing lung cancer diagnosis and treatment. However, despite being widely adopted, its benefit in clinical practice still remains to be fully elucidated [20].

SCLC continues to carry a poor prognosis, with a five-year survival rate of 3.5% and a 10-year survival rate of 1.8% [21]. The pathogenesis remains unclear, and no known predictive or diagnostic biomarkers exist. Delta-like ligand 3 (DLL3) is an inhibitory Notch ligand that is highly expressed in small cell lung cancer (SCLC) and has been identified as a potential therapeutic target [14, 22, 23]. DLL3 expression is not commonly found in normal adult tissues, which makes it an attractive target for anti-cancer therapies [22]. High DLL3 expression has been associated with poor prognosis in SCLC patients, suggesting its potential role as a prognostic biomarker [24, 25]. However, the prognostic significance of DLL3 expression in SCLC remains controversial, with some conflicting studies indicating a potential association between high DLL3 expression and overall survival [14].

Therapeutic strategies targeting DLL3, such as antibody-drug conjugates (ADCs), bispecific T-cell engagers, and chimeric antigen receptor (CAR) T-cell therapies, are under development [5, 26, 27]. Rovalpituzumab tesirine (Rova-T), an ADC targeting DLL3, has been evaluated in clinical trials, although it did not meet the expected outcomes in Phase III trials [23]. Other investigational therapies, including bispecific T-cell engagers like tarlatamab (AMG 757) and CAR T-cell therapies targeting DLL3, have shown promise in preclinical models and early clinical trials [28, 29].

The study conducted by Furuta et al. provides critical insights into the expression of these proteins in surgically resected SCLC samples [15]. The study

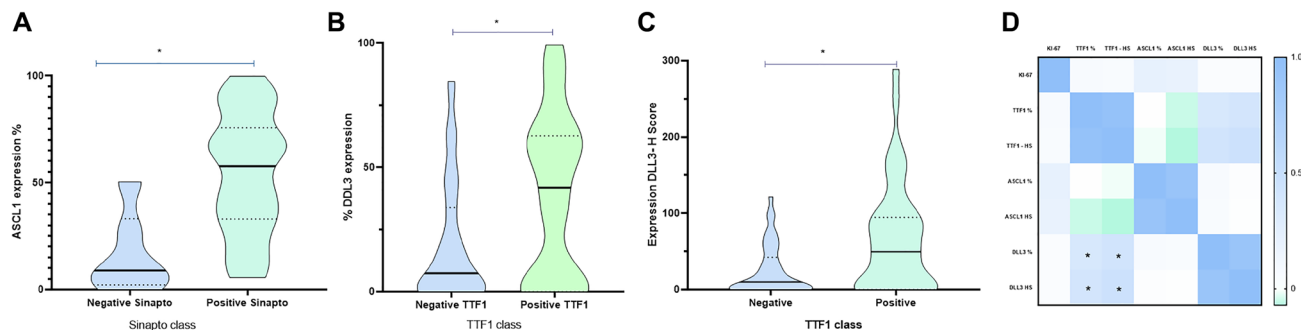

**Figure 3: Immunoexpression of TTF1, ASCL1 and DLL3 in patients with SLCL.** (A) Association of ASCL1 immunoexpression according to synaptophysin positivity. Patients with a positive synaptophysin stain are more likely to have greater ASCL1 expression, than patients with a negative synaptophysin. (B) DLL3 expression (percentage of positive cells) according to TTF1 expression in patients with SLCL. (C) DLL3 expression (H-score) according to TTF expression in patients with SLCL. (D) Correlation Biomarker, TTF1 and DLL3 correlate in patients with SCLC. \* $p < 0,05$ .

**Table 2: Association biomarkers KI67, TTF1, DLL3 and ASCL1 and characteristics in patients SCLC**

|                      |                  | KI67    |         | TTF1 Quant |              | TTF1 HS |              | ASCL1 Quant |              | ASCL1 HS |              | DLL3 Quant |              | DLL3 HS |              |
|----------------------|------------------|---------|---------|------------|--------------|---------|--------------|-------------|--------------|----------|--------------|------------|--------------|---------|--------------|
|                      |                  | Mediana | P-value | Mediana    | P-value      | Mediana | P-value      | Mediana     | P-value      | Mediana  | P-value      | Mediana    | P-value      | Mediana | P-value      |
| Age class 1          | ≤60              | 80,00   | 0,341   | 11,400     | 0,579        | 29,250  | 0,551        | 73,950      | 0,536        | 83,955   | 0,582        | 33,440     | 0,725        | 56,655  | 0,536        |
|                      | ≥61              | 79,70   |         | 29,300     |              | 40,900  |              | 50,700      |              | 56,345   |              | 15,750     |              | 25,865  |              |
| Age class 2          | ≤74              | 80,00   | 0,299   | 54,700     | 0,129        | 71,200  | 0,481        | 62,270      | 0,302        | 64,680   | 0,119        | 13,340     | 0,200        | 14,940  | 0,425        |
|                      | ≥75              | 70,00   |         | 0,000      |              | 0,000   |              | 49,110      |              | 51,280   |              | 29,400     |              | 40,240  |              |
| Sex                  | Female           | 79,70   | 0,393   | 53,000     | 0,314        | 70,100  | 0,512        | 51,780      | 0,201        | 56,825   | 0,148        | 24,000     | 0,444        | 32,850  | 0,684        |
|                      | Male             | 80,00   |         | 0,000      |              | 0,000   |              | 51,100      |              | 57,080   |              | 15,750     |              | 25,865  |              |
| Chromo A             | Negative         | 80,00   | 0,229   | 54,700     | 0,707        | 65,700  | 0,285        | 44,950      | 0,481        | 51,280   | 0,402        | 2,810      | 0,707        | 3,270   | 0,366        |
|                      | Positive         | 80,00   |         | 51,100     |              | 75,400  |              | 49,010      |              | 55,380   |              | 14,950     |              | 21,675  |              |
| SyP                  | Negative         | 80,00   | 0,888   | 50,600     | 0,952        | 69,350  | 0,888        | 8,854       | <b>0,004</b> | 9,075    | <b>0,005</b> | 5,145      | 0,533        | 5,745   | 0,615        |
|                      | Positive         | 80,00   |         | 54,700     |              | 69,000  |              | 53,110      |              | 55,700   |              | 13,500     |              | 13,700  |              |
| TTF1 Quant class 1   | Negative         | 80,00   | 0,770   | 0,000      | *            | 0,000   | *            | 67,290      | 0,097        | 74,540   | 0,103        | 13,340     | 0,068        | 14,940  | 0,071        |
|                      | Positive         | 80,00   |         | 90,400     |              | 182,100 |              | 44,950      |              | 55,060   |              | 35,000     |              | 46,800  |              |
| TTF1 Quant class 2   | Negative (0)     | 80,00   |         | 0,000      |              | 0,000   |              | 67,290      |              | 74,540   |              | 13,340     |              | 14,940  |              |
|                      | Low (1–49)       | 70,00   | 0,563   | 34,850     | *            | 63,750  | *            | 10,965      | 0,055        | 11,400   | 0,062        | 21,500     | 0,189        | 35,550  | 0,199        |
|                      | High (50–100)    | 80,00   |         | 92,100     |              | 237,600 |              | 47,570      |              | 55,430   |              | 40,600     |              | 52,110  |              |
| TTF1 HS class 3      | Negative         | 80,00   |         | 0,000      |              | 0,000   |              | 67,290      |              | 74,540   |              | 13,340     |              | 14,940  |              |
|                      | Low (1–149)      | 75,00   | 0,634   | 55,000     | *            | 81,000  | *            | 37,490      | 0,181        | 41,030   | 0,226        | 5,145      | <b>0,008</b> | 5,745   | <b>0,009</b> |
|                      | High (149–300)   | 80,00   |         | 96,100     |              | 249,520 |              | 44,950      |              | 55,430   |              | 55,690     |              | 79,300  |              |
| ASCL1 Quant class 1  | Negative         | 66,90   | 0,571   | 49,800     | 0,620        | 137,300 | 0,693        | 0,045       | *            | 0,050    | *            | 0,000      | 0,071        | 0,000   | 0,063        |
|                      | Positive         | 80,00   |         | 17,250     |              | 37,300  |              | 51,525      |              | 57,695   |              | 18,600     |              | 30,025  |              |
| ASCL1 Quant class 2  | Negative (0)     | 66,90   |         | 49,800     |              | 137,300 |              | 0,045       |              | 0,050    |              | 0,000      |              | 0,000   |              |
|                      | Low (1–49)       | 70,00   | 0,369   | 51,100     | 0,537        | 70,100  | 0,588        | 27,740      | *            | 31,050   | *            | 24,250     | 0,152        | 35,690  | 0,158        |
|                      | High (50–100)    | 80,00   |         | 0,000      |              | 0,000   |              | 74,410      |              | 86,980   |              | 14,950     |              | 28,540  |              |
| ASCL1 HS class 3     | Negative (0–10)  | 80,00   |         | 0,000      |              | 0,000   |              | 7,050       |              | 7,670    |              | 10,200     |              | 11,200  |              |
|                      | Low (11–150)     | 74,70   | 0,309   | 49,500     | 0,578        | 70,100  | 0,645        | 52,455      | *            | 58,925   | *            | 23,500     | 0,412        | 37,770  | 0,322        |
|                      | High (150–300)   | 80,00   |         | 0,000      |              | 0,000   |              | 95,840      |              | 172,960  |              | 24,390     |              | 27,430  |              |
| DLL3 Quant - class 1 | Negative         | 75,00   | 0,640   | 27,350     | 0,912        | 32,850  | 0,601        | 50,030      | 0,464        | 54,135   | 0,446        | 0,000      | *            | 0,000   | *            |
|                      | Positive (1–100) | 80,00   |         | 17,250     |              | 37,300  |              | 51,525      |              | 57,695   |              | 37,800     |              | 52,655  |              |
| DLL3 Quant - class 2 | Negative         | 75,00   |         | 27,350     |              | 32,850  |              | 50,030      |              | 54,135   |              | 0,000      |              | 0,000   |              |
|                      | Low (1–49)       | 80,00   | 0,837   | 0,000      | <b>0,011</b> | 0,000   | <b>0,003</b> | 53,110      | 0,762        | 57,170   | 0,748        | 16,400     | *            | 24,300  | *            |
|                      | High (50–100)    | 80,00   |         | 83,800     |              | 182,100 |              | 50,450      |              | 58,220   |              | 64,930     |              | 95,200  |              |
| DLL3 HS - class 2    | Negative         | 80,00   |         | 54,700     |              | 65,700  |              | 49,110      |              | 51,280   |              | 0,000      |              | 0,000   |              |
|                      | Low (1–149)      | 79,70   | 0,848   | 0,000      | <b>0,019</b> | 0,000   | <b>0,006</b> | 52,455      | 0,995        | 58,925   | 0,992        | 33,440     | *            | 43,325  | *            |
|                      | High (150–300)   | 80,00   |         | 99,300     |              | 242,900 |              | 37,150      |              | 39,150   |              | 94,310     |              | 170,930 |              |

Abbreviations: CgA: Chromogranin A; SyP: Synapthophysin; TTF1: Thyroid transcription factor 1; DLL3: Delta-like ligand 3; ASCL1: Achaete-scute homolog; HS: HScore.

reveals a high prevalence of DLL3 and ASCL1 expression in SCLC patients, with ASCL1 expression detected in 83% of the evaluated samples. These findings agree with our paper, which showed 90% positivity of ASCL1. This high expression rate aligns with DLL3's potential role in the disease's pathology and supports the development of DLL3-targeted therapies. The positive correlation between DLL3 and ASCL1 expressions

further underscores their interconnected roles in SCLC's molecular landscape, suggesting that interventions targeting these pathways could offer new avenues for treatment [15]. Their study also explores the prognostic implications of DLL3 and ASCL1 expression, finding no direct association with patient survival. Similarly to their findings, in our cohort we have not found any direct association of ASCL1 and DLL3 with the overall

survival, although we found a relation between positive TTF1 and a better survival rate (quantified by percentage of positive cells). These findings may be important in establishing practical protocols for scoring these immunohistochemical studies and selecting patients that may benefit from targeted therapies.

Similarly, another recent study demonstrated that high DLL3 and ASCL1 expression was associated with certain morphological features in LCNECs and SCLCs, and in early-stage patients without metastasis who underwent chemotherapy, high expression of both DLL3 and ASCL1 was linked to a better prognosis and a

lower risk of death [30]. Furthermore, DLL3 expression in LCNEC was associated with the expression of ASCL1 and neuroendocrine markers, suggesting a relationship between DLL3 expression and the neuroendocrine profile of these tumors [18]. These findings suggest that DLL3 and ASCL1 are not only correlated in their expression but may also be involved in the neuroendocrine phenotype of lung neuroendocrine tumors and could serve as potential therapeutic targets or prognostic indicators in these diseases. Specifically, ASCL1-positive/DLL3-high tumors may represent a subgroup of SCLC with unique vulnerabilities to DLL3-targeted

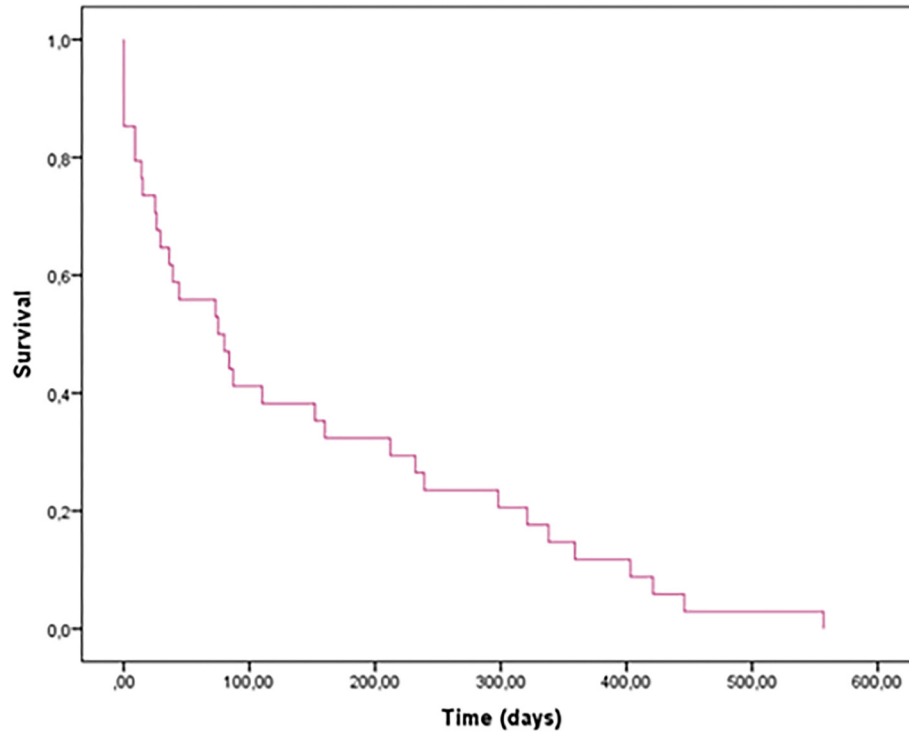

Figure 4: Global survival of all patients with DLL3.

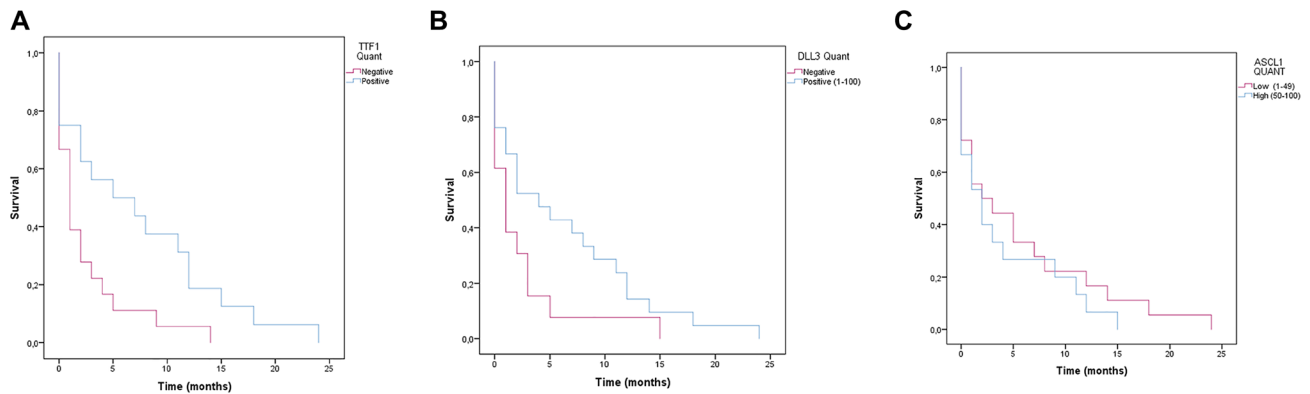

Figure 5: Survival analysis (Kaplan-Meier) of patients with SCLC. (A) TTF1 negative patients have a lower survival rate than TTF1 positive SCLC patients (Log rank  $p = 0.014$ ) and may be associated with an unfavorable prognosis with worse outcome in patients with SCLC. (B) DLL3 negative patients have a lower survival rate than DLL3 positive SCLC patients ( $p = 0.073$ ). (C) Survival analysis of patients with SCLC according to ASCL1 immunoeexpression ( $p = 0,458$ ).



therapies. Further research is warranted to validate these findings and explore the clinical utility of ASCL1/DLL3 co-expression as a predictive biomarker for therapeutic response.

In adenocarcinomas, TTF-1 has been shown to play a significant role in the pathogenesis of lung cancer, being expressed in 69–80% of lung adenocarcinoma cases. Clinically, TTF-1 expression is a diagnostic tool for identifying the histological type of lung cancer, distinguishing primary lung adenocarcinomas from metastatic forms, and acting as a prognostic indicator. Studies have shown that patients with positive TTF-1 expression exhibit longer overall survival (OS) in stage I lung adenocarcinoma [31, 32].

Small Cell Lung Cancer (SCLC), typically characterized as an undifferentiated cancer, exhibits TTF-1 positivity in 80–90% of cases, indicating a function beyond epithelial cell differentiation. Evidence of TTF-1 expression in non-pulmonary small cell cancers, such as aggressive small cell prostate cancer, supports its association with neuroendocrine differentiation and aggressive tumor behavior rather than characteristics of terminal respiratory unit cells [33–35]. In our samples, of interest, was the association of TTF-1 score with DLL3 expression, showing a potential role in TTF-1 as a differentiation and mechanistic marker, much more than only a diagnostic one.

The significant prevalence of DLL3 and ASCL1 expression in early-stage SCLC, as highlighted by Furuta et al. and corroborated by our findings, underscores their potential as therapeutic targets and prognostic biomarkers [15]. Our study further expands upon this, revealing a correlation between TTF1 positive expression and improved survival outcomes, emphasizing the importance of standardized scoring protocols for these immunohistochemical markers. This may enable the identification of patient subgroups that could particularly benefit from DLL3-targeted therapies, potentially personalizing treatment approaches for SCLC.

Additionally, the intriguing association between TTF-1 expression and DLL3, as observed in our study, suggests a multifaceted role for TTF-1 beyond its established diagnostic utility. This finding may have implications for understanding the molecular underpinnings of SCLC and could inform the development of novel therapeutic strategies. Further investigations into the mechanistic link between TTF-1 and DLL3 could uncover new avenues for intervention in this aggressive disease.

Despite the promising insights and potential therapeutic implications highlighted in our study, there are several limitations that should be acknowledged. First, our study's retrospective design may introduce selection bias, as it relies on previously collected data and samples, which may not be representative of the broader SCLC patient population. Additionally, the relatively small sample size limits the generalizability of our findings and may impact

the statistical power to detect significant associations or differences in survival outcomes.

Furthermore, our study primarily focuses on the expression of DLL3 and ASCL1 in small SCLC samples, which may not fully capture the heterogeneity of SCLC, especially in that most cases are inoperable or treated with different modalities. The lack of longitudinal data to track changes in marker expression over time and in response to treatment is another limitation. Finally, the interpretation of immunohistochemical scoring can be subjective, and inter-observer variability might affect the consistency of the results, even with the attempted scoring protocols tried here. Future studies should aim to include larger, more diverse cohorts and incorporate prospective designs to validate these findings and enhance their clinical applicability.

In summary, our findings and corroborative studies present a compelling case for the significance of TTF1 in the clinical landscape of small-cell lung cancer. The evidence of a better survival rate in patients with high expression of these proteins, despite the generally poor prognosis associated with SCLC, indicates their potential utility as biomarkers and as focal points for targeted therapy. Future research should continue to explore the mechanistic pathways influenced by these proteins, emphasizing developing therapeutic strategies that can effectively exploit these targets. By advancing our understanding of DLL3 and ASCL1 within the broader context of lung cancer pathology, we can hope to refine diagnostic criteria and enhance the specificity and efficacy of treatment protocols, ultimately leading to improved survival rates and quality of life for patients afflicted by this formidable disease.

## MATERIALS AND METHODS

### Cohort description

This observational, cross-sectional, and analytical study had a cohort of sixty-four sequential patients recruited between May 2018 and November 2022. Biopsies were analyzed in a reference thoracic pathology laboratory. Data were collected from electronic medical records in the respective hospital units where each patient was diagnosed and followed up. Inclusion criteria were defined as adults over 18 years of age with transbronchial biopsy of a primary SCLC tumor confirmed by histological analysis, sufficient material for the study of HE, DLL3, ASCL1, TTF-1, and Ki-67, and clinical follow-up to death. Exclusion Criteria were under 18, insufficient material for IHC analysis, lack of clinical data, or loss of clinical follow-up. This protocol was reviewed and approved by the Research Ethics Committee at the Federal University of Ceará (Protocol CAAE 59399322.9.0000.5049). The study was conducted under the Good Clinical Practice Guidelines and the Helsinki Declaration.

## Immunohistochemistry

Each tumor formalin-fixed, and paraffin-embedded tissue block was sectioned at 2  $\mu\text{m}$ . A hematoxylin and eosin (HE) staining was performed. Slides were stained with anti-DLL3-specific monoclonal antibody (dilution 1:100; clone EPR22592-18; cat. no. ab229902; Abcam, Cambridge, UK); anti-ASCL1 polyclonal antibody (dilution 1:200; cat. no. PA5-77868; Invitrogen, Massachusetts, USA); anti-TTF-1 specific monoclonal antibody (prediluted; clone 8G7G3/1; cat. no. 790-4398; Ventana Medical Systems, Inc.); and anti-Ki-67 monoclonal specific antibody (prediluted; clone 30-9; cat. no. 790-4286; Ventana Medical Systems, Inc.). We used the Ultraview DAB IHC Detection Kit (cat. no. 760-500; Ventana Medical Systems, Inc.), which includes a blocking reagent and a secondary antibody conjugated with polymer. Staining was performed using standard automated immunostaining equipment (Ultraview Benchmark Ventana; Ventana Medical Systems, Inc., Tucson, AZ, USA) according to the manufacturer's protocol. Chromogranin, synaptophysin and Ki-67 had been previously performed for the diagnosis, and retrieved from the pathology files. IHC slides had a positive control tissue: glioblastoma for DLL3, neuroendocrine tumor for ASCL1, thyroid tissue for TTF-1, and tonsil tissue for Ki-67. Positive and negative control slides were included in each assay. The slides were analyzed by optical microscopy to evaluate the positive and negative controls.

## Digital pathology analysis

ASCL1, DLL3, TTF-1 and Ki-67 slides were scanned using the KFBIO scanner equipment at 40x magnification. The SVS files were then imported to QuPath<sup>®</sup> software v. 0.5.0 as "DAB Brightfield," which allowed sample analysis. The files were loaded onto a project in QuPath software (QuPath source code, documentation, and links to the software download are available at <https://qupath.github.io>).

QuPath's segmentation feature can detect thousands of cells, identify them as objects in a hierarchical manner below the annotation or cases, and measure cell morphology and biomarker expression simultaneously (12). QuPath has recently been used as annotation software in deep learning to distinguish small-cell from large-cell neuroendocrine lung cancer [36].

For each slide the stain vectors were recalibrated on "Estimate Stain Vector" with automatic calibration. The positive cell detection was performed by the nucleus evaluation according to default parameters; the nucleus staining intensity threshold was set as 0.1, and the cell expansion was set to default to 5 micrometers, which is the default measurement for cell cytoplasm expansion from the nucleus until it meets the neighboring cell. The DAB intensity threshold was standardized according to each marker. For DLL3, the "thresholdCompartment" was

set to be "Cytoplasm: DAB OD Mean," and for ASCL1, Ki-67, and TTF-1 the "thresholdCompartment" was set to be "Nucleus: DAB OD mean."

For H-Score analysis, the intensity threshold parameters were set with three threshold points: the "thresholdPositive1" was set to 0.2, the "thresholdPositive2" was set to 0.4, and the "thresholdPositive3" was set to 0.6. The analysis was performed for each marker and the results were obtained as positive and negative, percentage and HScore. Figure 1 depicts an example of DLL3 expression in a tumor showing the deployment of QuPath algorithm to assess cells with zero, low, moderate and high expressions, which is color coded and curated by an experienced pathologist. Snapshots of representative images were exported to ImageJ for storage and illustrations (Figures 1 and 2), exported in high quality using TIFF extensions with 300 dpi and at least 5 inches in the shortest axis.

## Scoring criteria biomarkers

For DLL3, ASCL1, and TTF-1, IHC scoring was performed in two ways. First, the staining was semi-quantitatively evaluated using an immunohistochemical H-score (HS) method by an experienced thoracic pathologist and also by using a algorithm developed and of free access by QuPath [37–43]. The H-score method was applied based on the extent and intensity of cytoplasmic staining (1, 2, or 3) multiplied by the percentage of cells positive (proportion score), with a potential score ranging from 0 to 300.

The H-score is a classic semi-quantitative method used in pathology to assess the intensity and distribution of immunohistochemical staining in tissue samples. It is particularly valuable in research for evaluating the expression levels of various proteins within specific cells or tissue regions, which can be crucial for diagnosing and determining the prognosis of diseases, especially cancer. It has been used in several organ systems and cancer types, including oral squamous cancer, kidney cancer, breast cancer and lung cancer [37–43].

Over the past decade, several studies [37–45] have developed automated algorithms for the quantitative assessment of IHC images. However, significant efforts are still needed to improve quantification accuracy and efficiency [44–47]. More recently, several articles have automated the use of H-scoring to increase accuracy and reproducibility, using the QuPath software, as in the current study [48–51].

The second way was the analysis of the percentage of positive cells (0–100%). The cut-off of negative and positive, low and high, was according to each protein expression profile and was used as described in previous studies [45]. DLL3 and TTF-1 were considered positive if at least 1% of tumor cells had cytoplasmic and/or membranous on DLL3 and nuclear staining on TTF-1. Both proteins were considered low expression if positive



in less than 50% of tumor cells, while high expression was assumed if the protein was positive in more than 50% of tumor cells. ASCL1 was considered positive if at least 10% of tumor cells had nuclear staining. ASCL1 – H-score patients  $\leq 10$  were considered negative, H-scores of 11–149 were considered low expressed, and 150–300 were considered high expressed.

Chromogranin and synaptophysin were considered positive if at least 5% of tumor cells had cytoplasmic and/or membranous staining. In addition, a semi-quantitative scoring of 1, 2, and 3 intensity of staining was estimated by at least one pathologist. CD56 staining was considered only as positive when shown a membranous staining, or negative [52, 53].

The most recent 2021 WHO classification identifies the three markers indicative of neuroendocrine (NE) differentiation: chromogranin A, synaptophysin, and CD56. In addition, it mentions INSM1 as a potential new marker [54]. Determining positivity for these markers lacks defined thresholds, necessitating consideration of morphological features. Chromogranin and synaptophysin are genuine indicators of NE differentiation, as they bind to epitopes present in neurosecretory granules or synaptic vesicles. In SCLC, focal positivity for chromogranin A in some tumor cells is diagnosed [55, 56].

### Statistical analysis

Univariate descriptive statistics were performed on the recollected data. Normal variables were reported by their mean and standard deviation, and non-normal counterparts by median and interquartile range; count data were reported by absolute frequency and percentage. Overall survival analysis included univariate Kaplan-Meier curves using different biomarker strata according to DLL3, ASCL1, and TTF-1 presence, expression levels, and gender. Multivariate analysis included a correlation plot over the numerical variables and Cox regression analysis using a backstep variable selection strategy.

### Author contributions

S.S, J.S.C, C.N, F.T conceived the idea for writing this paper and conducted the writing. R.F, F.M.N, L.C.M, G.S and V.D contributed to the experimental and statistical analysis.

### CONFLICTS OF INTEREST

Authors have no conflicts of interest to declare.

### ETHICAL STATEMENT

This protocol was reviewed and approved by the Research Ethics Committee at the Federal University of Ceará (Protocol CAAE 59399322.9.0000.5049). The

study was conducted under the Good Clinical Practice Guidelines and the Helsinki Declaration.

### CONSENT

Informed consent was waived by the Ethics Committee due to the minimal risk posed to patient data and the low likelihood of harm associated with the study.

### FUNDING

No funding was used for this paper.

### REFERENCES

1. Wang Q, Gümüş ZH, Colarossi C, Memeo L, Wang X, Kong CY, Boffetta P. SCLC: Epidemiology, Risk Factors, Genetic Susceptibility, Molecular Pathology, Screening, and Early Detection. *J Thorac Oncol.* 2023; 18:31–46. <https://doi.org/10.1016/j.jtho.2022.10.002>. [PubMed]
2. Rudin CM, Reck M, Johnson ML, Blackhall F, Hann CL, Yang JC, Bailis JM, Bebb G, Goldrick A, Umejiego J, Paz-Ares L. Emerging therapies targeting the delta-like ligand 3 (DLL3) in small cell lung cancer. *J Hematol Oncol.* 2023; 16:66. <https://doi.org/10.1186/s13045-023-01464-y>. [PubMed]
3. Blackhall F, Jao K, Greillier L, Cho BC, Penkov K, Reguart N, Majem M, Nackaerts K, Syrigos K, Hansen K, Schuette W, Cetnar J, Cappuzzo F, et al. Efficacy and Safety of Rovalpituzumab Tesirine Compared With Topotecan as Second-Line Therapy in DLL3-High SCLC: Results From the Phase 3 TAHOE Study. *J Thorac Oncol.* 2021; 16:1547–58. <https://doi.org/10.1016/j.jtho.2021.02.009>. [PubMed]
4. Denninghoff V, Russo A, de Miguel-Pérez D, Malapelle U, Benyounes A, Gittens A, Cardona AF, Rolfo C. Small Cell Lung Cancer: State of the Art of the Molecular and Genetic Landscape and Novel Perspective. *Cancers (Basel).* 2021; 13:1723. <https://doi.org/10.3390/cancers13071723>. [PubMed]
5. Paz-Ares L, Champiat S, Lai WV, Izumi H, Govindan R, Boyer M, Hummel HD, Borghaei H, Johnson ML, Steeghs N, Blackhall F, Dowlati A, Reguart N, et al. Tarlatamab, a First-in-Class DLL3-Targeted Bispecific T-Cell Engager, in Recurrent Small-Cell Lung Cancer: An Open-Label, Phase I Study. *J Clin Oncol.* 2023; 41:2893–903. <https://doi.org/10.1200/JCO.22.02823>. [PubMed]
6. Dhillon S. Tarlatamab: First Approval. *Drugs.* 2024; 84:995–1003. <https://doi.org/10.1007/s40265-024-02070-z>. [PubMed]
7. Ahn MJ, Cho BC, Filip E, Korantzis I, Ohashi K, Majem M, Juan-Vidal O, Handzhiev S, Izumi H, Lee JS, Dziadziuszko R, Wolf J, Blackhall F, et al, and DeLLphi-301 Investigators. Tarlatamab for Patients with Previously Treated Small-Cell Lung Cancer. *N Engl J Med.* 2023; 389:2063–75. <https://doi.org/10.1056/NEJMoa2307980>. [PubMed]

8. Giffin MJ, Cooke K, Lobenhofer EK, Estrada J, Zhan J, Deegen P, Thomas M, Murawsky CM, Werner J, Liu S, Lee F, Homann O, Friedrich M, et al. AMG 757, a Half-Life Extended, DLL3-Targeted Bispecific T-Cell Engager, Shows High Potency and Sensitivity in Preclinical Models of Small-Cell Lung Cancer. *Clin Cancer Res.* 2021; 27:1526–37. <https://doi.org/10.1158/1078-0432.CCR-20-2845>. [PubMed]
9. Crabtree JS, Singleton CS, Miele L. Notch Signaling in Neuroendocrine Tumors. *Front Oncol.* 2016; 6:94. <https://doi.org/10.3389/fonc.2016.00094>. [PubMed]
10. Kunnimalaiyaan M, Chen H. Tumor suppressor role of Notch-1 signaling in neuroendocrine tumors. *Oncologist.* 2007; 12:535–42. <https://doi.org/10.1634/theoncologist.12-5-535>. [PubMed]
11. Wang H, Chen Y, Fernandez-Del Castillo C, Yilmaz O, Deshpande V. Heterogeneity in signaling pathways of gastroenteropancreatic neuroendocrine tumors: a critical look at notch signaling pathway. *Mod Pathol.* 2013; 26:139–47. <https://doi.org/10.1038/modpathol.2012.143>. [PubMed]
12. Sharma SK, Pourat J, Abdel-Atti D, Carlin SD, Piersigilli A, Bankovich AJ, Gardner EE, Hamdy O, Isse K, Bheddah S, Sandoval J, Cunanan KM, Johansen EB, et al. Noninvasive Interrogation of DLL3 Expression in Metastatic Small Cell Lung Cancer. *Cancer Res.* 2017; 77:3931–41. <https://doi.org/10.1158/0008-5472.CAN-17-0299>. [PubMed]
13. Rojo F, Corassa M, Mavroudis D, Öz AB, Biesma B, Bric L, Pauwels P, Sailer V, Gosney J, Miljkovic D, Hader C, Wu M, Almarez T, Penault-Llorca F. International real-world study of DLL3 expression in patients with small cell lung cancer. *Lung Cancer.* 2020; 147:237–43. <https://doi.org/10.1016/j.lungcan.2020.07.026>. [PubMed]
14. Ali G, Di Stefano I, Poma AM, Ricci S, Proietti A, Davini F, Lucchi M, Melfi F, Fontanini G. Prevalence of Delta-Like Protein 3 in a Consecutive Series of Surgically Resected Lung Neuroendocrine Neoplasms. *Front Oncol.* 2021; 11:729765. <https://doi.org/10.3389/fonc.2021.729765>. [PubMed]
15. Furuta M, Sakakibara-Konishi J, Kikuchi H, Yokouchi H, Nishihara H, Minemura H, Harada M, Yamazaki S, Akie K, Fujita Y, Takamura K, Kojima T, Harada T, et al, and Hokkaido Lung Cancer Clinical Study Group. Analysis of DLL3 and ASCL1 in Surgically Resected Small Cell Lung Cancer (HOT1702). *Oncologist.* 2019; 24:e1172–79. <https://doi.org/10.1634/theoncologist.2018-0676>. [PubMed]
16. Horie M, Miyashita N, Mattsson JSM, Mikami Y, Sandelin M, Brunnström H, Micke P, Nagase T, Saito A. An integrative transcriptome analysis reveals a functional role for thyroid transcription factor-1 in small cell lung cancer. *J Pathol.* 2018; 246:154–65. <https://doi.org/10.1002/path.5109>. [PubMed]
17. Yan LX, Liu YH, Li Z, Luo DL, Li YF, Yan JH, Zhang JT, Liu C, Liu XH, He J. Prognostic value of delta-like protein 3 combined with thyroid transcription factor-1 in small-cell lung cancer. *Oncol Lett.* 2019; 18:2254–61. <https://doi.org/10.3892/ol.2019.10538>. [PubMed]
18. Hermans BCM, Derks JL, Thunnissen E, van Suylen RJ, den Bakker MA, Groen HJM, Smit EF, Damhuis RA, van den Broek EC, Ruland A, Speel EJM, Dingemans AMC, and PALGA-group. DLL3 expression in large cell neuroendocrine carcinoma (LCNEC) and association with molecular subtypes and neuroendocrine profile. *Lung Cancer.* 2019; 138:102–8. <https://doi.org/10.1016/j.lungcan.2019.10.010>. [PubMed]
19. Denninghoff V, Jose Serrano M. Liquid Biopsy. *Molecular Diagnostics of Cancer: IntechOpen.* 2023. <https://doi.org/10.5772/intechopen.1002519>.
20. Rolfo C, Denninghoff V. Globalization of precision medicine programs in lung cancer: a health system challenge. *Lancet Reg Health Eur.* 2023; 36:100819. <https://doi.org/10.1016/j.lanepe.2023.100819>. [PubMed]
21. Lassen U, Osterlind K, Hansen M, Dombernowsky P, Bergman B, Hansen HH. Long-term survival in small-cell lung cancer: posttreatment characteristics in patients surviving 5 to 18+ years--an analysis of 1,714 consecutive patients. *J Clin Oncol.* 1995; 13:1215–20. <https://doi.org/10.1200/JCO.1995.13.5.1215>. [PubMed]
22. Owen DH, Giffin MJ, Bailis JM, Smit MD, Carbone DP, He K. DLL3: an emerging target in small cell lung cancer. *J Hematol Oncol.* 2019; 12:61. <https://doi.org/10.1186/s13045-019-0745-2>. [PubMed]
23. Xie H, Boland JM, Maleszewski JJ, Aubry MC, Yi ES, Jenkins SM, Koeplin JW, Terra SBS, Mansfield AS, Roden AC. Expression of delta-like protein 3 is reproducibly present in a subset of small cell lung carcinomas and pulmonary carcinoid tumors. *Lung Cancer.* 2019; 135:73–79. <https://doi.org/10.1016/j.lungcan.2019.07.016>. [PubMed]
24. Chen B, Li H, Liu C, Wang S, Zhang F, Zhang L, Li M, Li G. Potential prognostic value of delta-like protein 3 in small cell lung cancer: a meta-analysis. *World J Surg Oncol.* 2020; 18:226. <https://doi.org/10.1186/s12957-020-02004-5>. [PubMed]
25. Regzedmaa O, Li Y, Li Y, Zhang H, Wang J, Gong H, Yuan Y, Li W, Liu H, Chen J. Prevalence of DLL3, CTLA-4 and MSTN Expression in Patients with Small Cell Lung Cancer. *Onco Targets Ther.* 2019; 12:10043–55. <https://doi.org/10.2147/OTT.S216362>. [PubMed]
26. Hipp S, Voynov V, Drobits-Handl B, Giragossian C, Trapani F, Nixon AE, Scheer JM, Adam PJ. A Bispecific DLL3/CD3 IgG-Like T-Cell Engaging Antibody Induces Antitumor Responses in Small Cell Lung Cancer. *Clin Cancer Res.* 2020; 26:5258–68. <https://doi.org/10.1158/1078-0432.CCR-20-0926>. [PubMed]
27. Yang W, Wang W, Li Z, Wu J, Huang X, Li J, Zhang X, Ye X. Delta-like ligand 3 in small cell lung cancer: Potential mechanism and treatment progress. *Crit Rev Oncol Hematol.* 2023; 191:104136. <https://doi.org/10.1016/j.critrevonc.2023.104136>. [PubMed]
28. Zhang H, Yang Y, Li X, Yuan X, Chu Q. Targeting the Notch signaling pathway and the Notch ligand, DLL3, in small



- cell lung cancer. *Biomed Pharmacother.* 2023; 159:114248. <https://doi.org/10.1016/j.biopha.2023.114248>. [PubMed]
29. Kuempers C, Jagomast T, Krupar R, Paulsen FO, Heidel C, Ribbat-Idel J, Idel C, Märkl B, Anlauf M, Berezowska S, Tiemann M, Bösmüller H, Fend F, et al. Delta-Like Protein 3 Expression in Paired Chemo-naïve and Chemo-relapsed Small Cell Lung Cancer Samples. *Front Med (Lausanne).* 2021; 8:734901. <https://doi.org/10.3389/fmed.2021.734901>. [PubMed]
  30. Prieto TG, Baldavira CM, Machado-Rugolo J, Olivieri EHR, Silva ECA, Silva VG, Ab'Saber AM, Takagaki TY, Capelozzi VL. Clinical and morphological features of large-cell neuroendocrine carcinomas and small-cell lung carcinomas expressing the DLL3 and ASCL1 oncoproteins. *Braz J Med Biol Res.* 2023; 56:e12921. <https://doi.org/10.1590/1414-431X2023e12921>. [PubMed]
  31. Nakahama K, Kaneda H, Osawa M, Izumi M, Yoshimoto N, Sugimoto A, Nagamine H, Ogawa K, Matsumoto Y, Sawa K, Tani Y, Mitsuoka S, Watanabe T, et al. Association of thyroid transcription factor-1 with the efficacy of immune-checkpoint inhibitors in patients with advanced lung adenocarcinoma. *Thorac Cancer.* 2022; 13:2309–17. <https://doi.org/10.1111/1759-7714.14560>. [PubMed]
  32. Iso H, Hisakane K, Mikami E, Suzuki T, Matsuki S, Atsumi K, Nagata K, Seike M, Hirose T. Thyroid transcription factor-1 (TTF-1) expression and the efficacy of combination therapy with immune checkpoint inhibitors and cytotoxic chemotherapy in non-squamous non-small cell lung cancer. *Transl Lung Cancer Res.* 2023; 12:1850–61. <https://doi.org/10.21037/tlcr-23-331>. [PubMed]
  33. Miyachi E, Motoi N, Ono H, Ninomiya H, Ohyanagi F, Nishio M, Okumura S, Ichinose M, Ishikawa Y. Distinct Characteristics of Small Cell Lung Cancer Correlate With Central or Peripheral Origin: Subtyping Based on Location and Expression of Transcription Factor TTF-1. *Medicine (Baltimore).* 2015; 94:e2324. <https://doi.org/10.1097/MD.0000000000002324>. [PubMed]
  34. Misch D, Blum T, Boch C, Weiss T, Crolow C, Griff S, Mairinger T, Bauer TT, Kollmeier J. Value of thyroid transcription factor (TTF)-1 for diagnosis and prognosis of patients with locally advanced or metastatic small cell lung cancer. *Diagn Pathol.* 2015; 10:21. <https://doi.org/10.1186/s13000-015-0250-z>. [PubMed]
  35. Kaufmann O, Dietel M. Expression of thyroid transcription factor-1 in pulmonary and extrapulmonary small cell carcinomas and other neuroendocrine carcinomas of various primary sites. *Histopathology.* 2000; 36:415–20. <https://doi.org/10.1046/j.1365-2559.2000.00890.x>. [PubMed]
  36. Gonzalez D, Dietz RL, Pantanowitz L. Feasibility of a deep learning algorithm to distinguish large cell neuroendocrine from small cell lung carcinoma in cytology specimens. *Cytopathology.* 2020; 31:426–31. <https://doi.org/10.1111/cyt.12829>. [PubMed]
  37. Azim HA Jr, Peccatori FA, Brohée S, Branstetter D, Loi S, Viale G, Piccart M, Dougall WC, Pruneri G, Sotiriou C. RANK-ligand (RANKL) expression in young breast cancer patients and during pregnancy. *Breast Cancer Res.* 2015; 17:24. <https://doi.org/10.1186/s13058-015-0538-7>. [PubMed]
  38. de Souza AA, Altemani A, de Araujo NS, Texeira LN, de Araújo VC, Soares AB. Estrogen Receptor, Progesterone Receptor, and HER-2 Expression in Recurrent Pleomorphic Adenoma. *Clin Pathol.* 2019; 12:2632010X19873384. <https://doi.org/10.1177/2632010X19873384>. [PubMed]
  39. Derangère V, Lecuelle J, Lepage C, Aoulad-Ben Salem O, Allatsem BM, Ilie A, Bouché O, Phelip JM, Baconnier M, Pezet D, Sebbagh V, Terrebbonne E, Bouard G, et al, and PRODIGE 13 investigators and collaborators. Combination of CDX2 H-score quantitative analysis with CD3 AI-guided analysis identifies patients with a good prognosis only in stage III colon cancer. *Eur J Cancer.* 2022; 172:221–30. <https://doi.org/10.1016/j.ejca.2022.05.040>. [PubMed]
  40. Parris TZ, Aziz L, Kovács A, Hajizadeh S, Nemes S, Semaan M, Chen CY, Karlsson P, Helou K. Clinical relevance of breast cancer-related genes as potential biomarkers for oral squamous cell carcinoma. *BMC Cancer.* 2014; 14:324. <https://doi.org/10.1186/1471-2407-14-324>. [PubMed]
  41. Starzyńska A, Sobocki BK, Sakowicz-Burkiewicz M, Jereczek-Fossa BA, Alterio D, Szot O, Korwat A, Pęksa R. VISTA H-Score Is Significantly Associated with a 5-Year DFS Rate in Oral Squamous Cell Carcinoma. *J Clin Med.* 2023; 12:1619. <https://doi.org/10.3390/jcm12041619>. [PubMed]
  42. Thike AA, Chng MJ, Fook-Chong S, Tan PH. Immunohistochemical expression of hormone receptors in invasive breast carcinoma: correlation of results of H-score with pathological parameters. *Pathology.* 2001; 33:21–25. [PubMed]
  43. Vougiouklakis T, Belovarac BJ, Lytle A, Chiriboga L, Ozerdem U. The diagnostic utility of EZH2 H-score and Ki-67 index in non-invasive breast apocrine lesions. *Pathol Res Pract.* 2020; 216:153041. <https://doi.org/10.1016/j.prp.2020.153041>. [PubMed]
  44. Cass JD, Varma S, Day AG, Sangrar W, Rajput AB, Raptis LH, Squire J, Madarnas Y, Sengupta SK, Elliott BE. Automated Quantitative Analysis of p53, Cyclin D1, Ki67 and pERK Expression in Breast Carcinoma Does Not Differ from Expert Pathologist Scoring and Correlates with Clinico-Pathological Characteristics. *Cancers (Basel).* 2012; 4:725–42. <https://doi.org/10.3390/cancers4030725>. [PubMed]
  45. Baine MK, Hsieh MS, Lai WV, Egger JV, Jungbluth AA, Daneshbod Y, Beras A, Spencer R, Lopardo J, Bodd F, Montecalvo J, Sauter JL, Chang JC, et al. SCLC Subtypes Defined by ASCL1, NEUROD1, POU2F3, and YAP1: A Comprehensive Immunohistochemical and Histopathologic Characterization. *J Thorac Oncol.* 2020; 15:1823–35. <https://doi.org/10.1016/j.jtho.2020.09.009>. [PubMed]

46. Rizzardi AE, Johnson AT, Vogel RI, Pambuccian SE, Henriksen J, Skubitz AP, Metzger GJ, Schmechel SC. Quantitative comparison of immunohistochemical staining measured by digital image analysis versus pathologist visual scoring. *Diagn Pathol.* 2012; 7:42. <https://doi.org/10.1186/1746-1596-7-42>. [PubMed]
47. Rizzardi AE, Zhang X, Vogel RI, Kolb S, Geybels MS, Leung YK, Henriksen JC, Ho SM, Kwak J, Stanford JL, Schmechel SC. Quantitative comparison and reproducibility of pathologist scoring and digital image analysis of estrogen receptor  $\beta$  immunohistochemistry in prostate cancer. *Diagn Pathol.* 2016; 11:63. <https://doi.org/10.1186/s13000-016-0511-5>. [PubMed]
48. Bai Y, Cole K, Martinez-Morilla S, Ahmed FS, Zugazagoitia J, Staaf J, Bosch A, Ehinger A, Nimeus E, Hartman J, Acs B, Rimm DL. An Open-Source, Automated Tumor-Infiltrating Lymphocyte Algorithm for Prognosis in Triple-Negative Breast Cancer. *Clin Cancer Res.* 2021; 27:5557–65. <https://doi.org/10.1158/1078-0432.CCR-21-0325>. [PubMed]
49. Baker GM, Bret-Mounet VC, Wang T, Veta M, Zheng H, Collins LC, Eliassen AH, Tamimi RM, Heng YJ. Immunohistochemistry scoring of breast tumor tissue microarrays: A comparison study across three software applications. *J Pathol Inform.* 2022; 13:100118. <https://doi.org/10.1016/j.jpi.2022.100118>. [PubMed]
50. Boyaci C, Sun W, Robertson S, Acs B, Hartman J. Independent Clinical Validation of the Automated Ki67 Scoring Guideline from the International Ki67 in Breast Cancer Working Group. *Biomolecules.* 2021; 11:1612. <https://doi.org/10.3390/biom11111612>. [PubMed]
51. Koch EAT, Erdmann M, Berking C, Kiesewetter F, Kramer R, Schliep S, Heppt MV. Standardized Computer-Assisted Analysis of PRAME Immunoreactivity in Dysplastic Nevi and Superficial Spreading Melanomas. *Int J Mol Sci.* 2023; 24:6388. <https://doi.org/10.3390/ijms24076388>. [PubMed]
52. Pelosi G, Sonzogni A, Harari S, Albini A, Bresaola E, Marchiò C, Massa F, Righi L, Gatti G, Papanikolaou N, Vijayvergia N, Calabrese F, Papotti M. Classification of pulmonary neuroendocrine tumors: new insights. *Transl Lung Cancer Res.* 2017; 6:513–29. <https://doi.org/10.21037/tlcr.2017.09.04>. [PubMed]
53. Yatabe Y, Dacic S, Borczuk AC, Warth A, Russell PA, Lantuejoul S, Beasley MB, Thunnissen E, Pelosi G, Rekhtman N, Bubendorf L, Mino-Kenudson M, Yoshida A, et al. Best Practices Recommendations for Diagnostic Immunohistochemistry in Lung Cancer. *J Thorac Oncol.* 2019; 14:377–407. <https://doi.org/10.1016/j.jtho.2018.12.005>. [PubMed]
54. Rooper LM, Sharma R, Li QK, Illei PB, Westra WH. INSM1 Demonstrates Superior Performance to the Individual and Combined Use of Synaptophysin, Chromogranin and CD56 for Diagnosing Neuroendocrine Tumors of the Thoracic Cavity. *Am J Surg Pathol.* 2017; 41:1561–69. <https://doi.org/10.1097/PAS.0000000000000916>. [PubMed]
55. Nicholson AG. The WHO 2015 classification of lung tumours: Evolution of tumour classification in lung cancer. *Pathology.* 2016; 48:S7. <https://doi.org/10.1016/j.pathol.2015.12.019>.
56. Travis WD BE, Burke AP, Marx A, Nicholson AG. WHO Classification of Tumours: Thoracic Tumours. (Lyon: International Agency for Research on Cancer). 2021.
